# Supplementary material for: The Prognostic and Therapeutic Potential of LRIG3 and Soluble LRIG3 in Glioblastoma
Source: Front Oncol. 2019 Jun 6;9:447. doi: 10.3389/fonc.2019.00447 (PMC6563081; doi:10.3389/fonc.2019.00447)
Supplement: Table S2 — Characteristics of glioma patients possessing cystic lesions. [file Table_2.xlsx]

## Sheet: Sheet1
Table S2. Characteristics of glioma patients possessing cystic lesions
Patient No.	Sex	Age	Histopathologic diagnosis	WHO Grade	Location of lesions
1	Female	53	DA	II	rt. frontal lobe
2	Male	26	DA	II	lt. occipital lobe
3	Female	40	O	II	rt. frontal lobe
4	Male	14	DA	III	lt. frontal lobe
5	Male	50	AA	III	lt. frontal lobe
6	Male	36	AA	III	lt. temporoparietal lobe
7	Male	38	GBM	IV	rt. frontal lobe
8	Female	51	GBM	IV	rt. frontal lobe
9	Male	37	GBM	IV	lt. occipitotemporal lobe
10	Male	11	GBM	IV	rt. parietooccipital lobe
11	Female	13	GBM	IV	lt. frontal lobe
These samples were collected from March 2015 to May 2017. DA, diffuse astrocytoma; O, oligodendroglioma; AA, anaplastic astrocytoma; GBM, glioblastoma multiform. rt., right.; lt., left..
